# Supplementary material for: Genomic Surveillance of Listeria monocytogenes in Taiwan, 2014 to 2019
Source: PubMed Central journal article supplement (PMC9769603; doi:10.1128/spectrum.01825-22), 2022-10-12
Supplement: spectrum.01825-22-s0001.pdf [file spectrum.01825-22-s0001.pdf]

## SUPPLEMENTAL MATERIAL

### Genomic surveillance of *Listeria monocytogenes* in Taiwan, 2014-2019

Yu-Huan Tsai<sup>1,\*</sup>, Alexandra Moura<sup>2,3,\*</sup>, Zi-Qi Gu<sup>1</sup>, Jui-Hsien Chang<sup>4</sup>, Ying-Shu Liao<sup>4</sup>, Ru-Hsiou Teng<sup>4</sup>, Kuo-Yao Tseng<sup>1</sup>, Dai-Ling Chang<sup>1</sup>, Wei-Ren Liu<sup>1</sup>, Yu-Tsung Huang<sup>5,6</sup>, Alexandre Leclercq<sup>2,3</sup>, Hsiu-Jung Lo<sup>7,8,9</sup>, Marc Lecuit<sup>2,3,10,#</sup>, Chien-Shun Chiou<sup>4,#</sup>

<sup>1</sup> Laboratory of Host-Microbe Interactions and Cell Dynamics, Institute of Microbiology and Immunology, National Yang Ming Chiao Tung University, Taipei, Taiwan

<sup>2</sup> Institut Pasteur, Université Paris Cité, Inserm U1117, Biology of Infection Unit, Paris, France

<sup>3</sup> Institut Pasteur, National Reference Centre and WHO Collaborating Centre *Listeria*, Paris, France

<sup>4</sup> Center for Diagnostics and Vaccine Development, Centers for Disease Control, Taichung, Taiwan

<sup>5</sup> Departments of Laboratory Medicine and Internal Medicine, National Taiwan University Hospital, National Taiwan University College of Medicine, Taipei, Taiwan

<sup>6</sup> Graduate Institute of Clinical Laboratory Sciences and Medical Biotechnology, National Taiwan University, Taipei, Taiwan

<sup>7</sup> National Institute of Infectious Disease and Vaccinology, National Health Research Institutes, Miaoli, Taiwan

<sup>8</sup> School of Dentistry, China Medical University, Taichung, Taiwan

<sup>9</sup> Department of Biological Science and Technology, National Yang Ming Chiao Tung University, Hsinchu, Taiwan

<sup>10</sup> Necker-Enfants Malades University Hospital, Division of Infectious Diseases and Tropical Medicine, Institut Imagine, APHP, Paris, France

Table S1. Number of *Listeria monocytogenes*-positive food samples collected per region and food type in this study.

| Product         | Taipei      | New Tapei   | Taichung     | Hsinchu   | Total        |
|-----------------|-------------|-------------|--------------|-----------|--------------|
| Raw ground pork | 18/27 (67%) | 19/28 (68%) | 32/62 (52%)  | -         | 69/117 (59%) |
| Raw chicken     | 5/23 (22%)  | 8/27 (30%)  | 12/63 (19%)  | -         | 25/113 (22%) |
| Mixed salads    | -           | -           | -            | 0/50 (0%) | 0/50 (0%)    |
| Total           | 23/50 (46%) | 27/55 (49%) | 44/125 (35%) | 0/50 (0%) | 94/290 (32%) |

Table S2. Characteristics of *Listeria monocytogenes* isolates retrieved in this study (N=493).

[extended excel file]

Table S3. Previously reported cgMLST types detected in this study ( $n=10$ ).

| cgMLST type<br>(clonal complex, serogroup) | source(s)<br>(this study) | source(s)<br>(other studies) | countries<br>(other studies) | source lab             | Min. cgMLST<br>similarity (%) |
|--------------------------------------------|---------------------------|------------------------------|------------------------------|------------------------|-------------------------------|
| <i>Lineage 1</i>                           |                           |                              |                              |                        |                               |
| L1-SL1-ST1-CT2384 (CC1, IVb)               | H                         | H,F,PE                       | US                           | FDA,CDC                | 99.6%                         |
| L1-SL224-ST845-CT21 (CC224, IIb)           | H                         |                              | MX,US                        | FDA,SENEICA            | 99.9%                         |
| L1-SL87-ST87-CT58 (CC87, IIb)              | H,F                       | H,F,PE                       | AU,CA,CN,CO,DE,FR,SK,US      | CDC,CFIA,DI,FDA,IP,RKI | 99.6%                         |
| <i>Lineage 2</i>                           |                           |                              |                              |                        |                               |
| L2-SL101-ST101-CT4370 (CC101, IIa)         | H                         | n.a.                         | n.a.                         | n.a.                   | 99.7%                         |
| L2-SL155-ST155-CT4364 (CC155, IIa)         | H,F                       | n.a.                         | n.a.                         | n.a.                   | 99.6%                         |
| L2-SL16-ST16-CT5516 (CC8, IIa)             | F                         | F                            | CA                           | CFIA                   | 99.7%                         |
| L2-SL177-ST177-CT5041 (CC177, IIa)         | H                         | H                            | KH                           | CDC-TW                 | 99.8%                         |
| L2-SL378-ST378-CT4349 (CC19, IIa)          | H,F                       | H                            | KH                           | CDC-TW                 | 99.6%                         |
| L2-SL8-ST8-CT5167 (CC8, IIa)               | H                         | n.a.                         | n.a.                         | n.a.                   | 99.9%                         |
| L2-SL9-ST9-CT5537 (CC9,IIa, IIc)           | F                         | H,F                          | FR                           | IP                     | 99.8%                         |

Source abbreviations: H, human; F, food; PE, food production environment.

Country abbreviations: AU, Australia; CA, Canada; CN, China; CO, Colombia; FR, France; KH, Cambodia; MX, Mexico; SK, South Korea; US, United States of America; n.a., not available.

Source lab abbreviations: CDC, Centers for Disease Control, United States; CDC-TW, Centers for Disease Control Taiwan; CFIA, Canadian Food Inspection Agency, Canada; DI, Doherty Institute, Australia; FDA, Food and Drug Administration, United States; IP, Institut Pasteur, France; RKI, Robert Koch Institut, Germany; SENESICA, Servicio Nacional de Sanidad Inocuidad y Calidad Agroalimentaria, Mexico; n.a., not available.

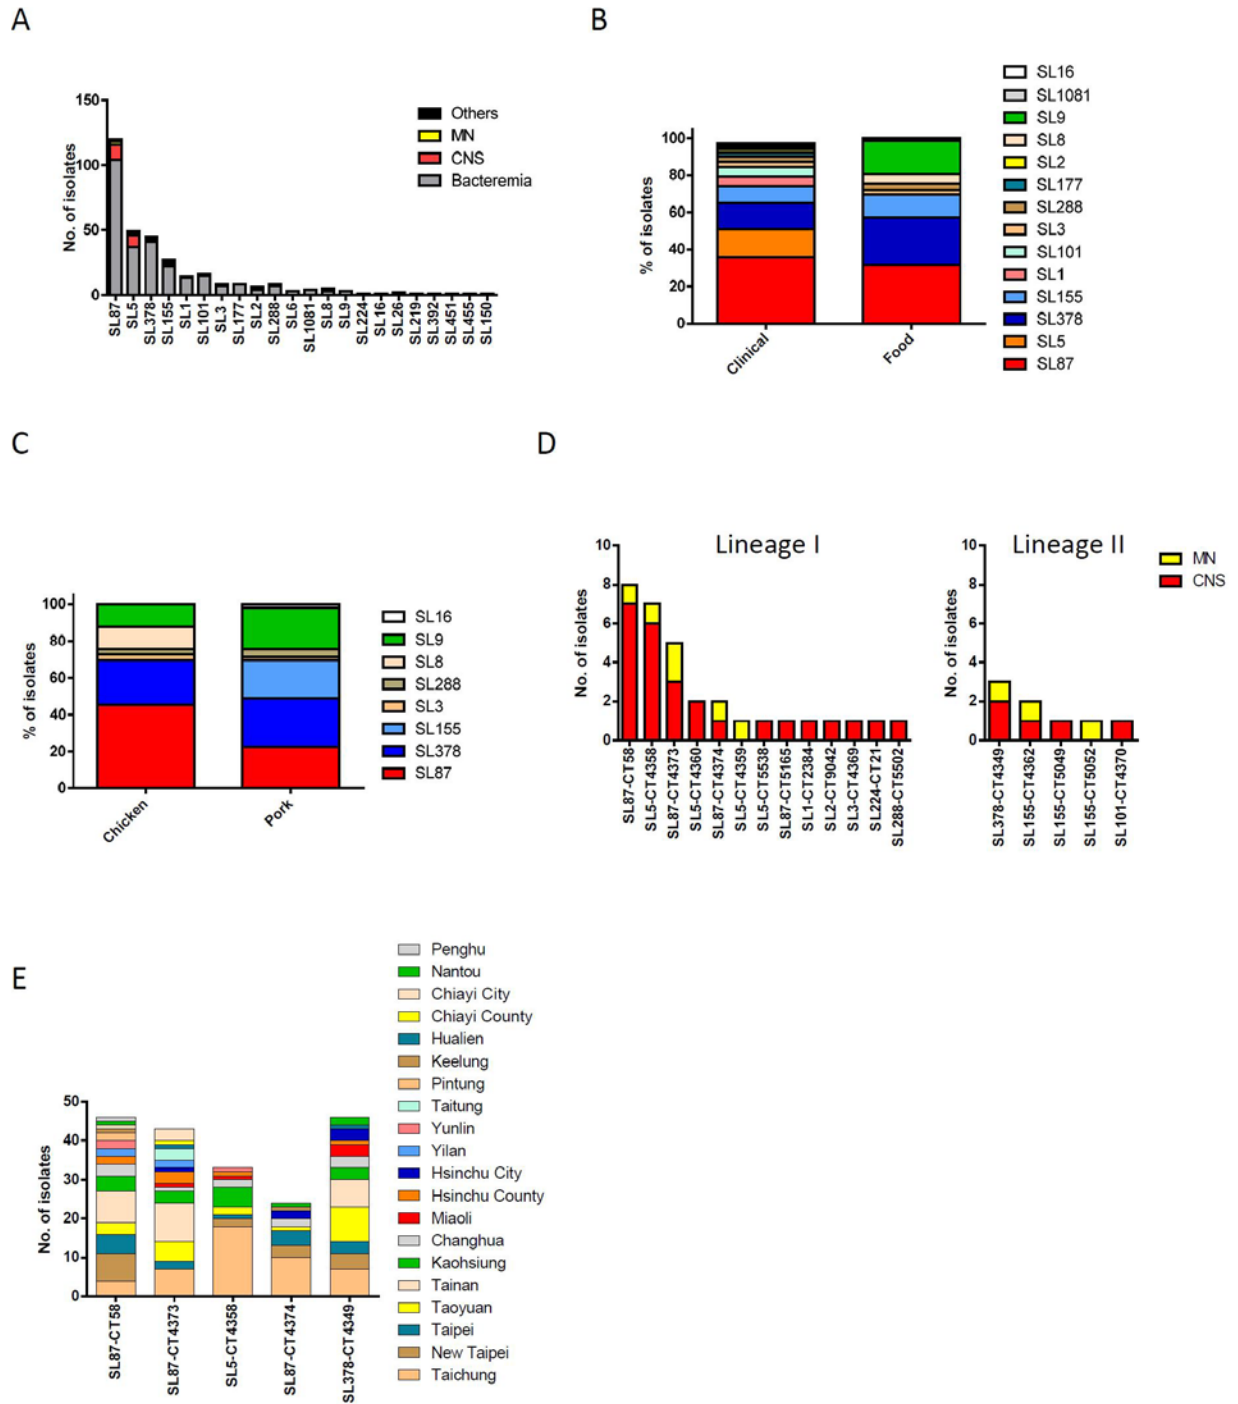

Figure S1. Distribution of *L. monocytogenes* major cgMLST sublineages (SLs) and types (CTs) in clinical and food sources in Taiwan. (A) No. isolates per SL and clinical form (2018-2019). (B) Percentage of larger SLs in clinical and food sources (2014-2019). (C) Percentage of larger SLs per food type (2014-2019). (D) Prevalence of cgMLST types in maternal-neonatal and CNS infections, for which the clinical information was available ( $n=327$  isolates). (E) Distribution of major CTs of clinical isolates in different administrative regions of Taiwan. Abbreviations: CNS, central nervous system infection; MN, maternal-neonatal infections.
